# Supplementary material for: New Laboratory Protocol to Determine the Oxidative Stress Profile of Human Nasal Epithelial Cells Using Flow Cytometry
Source: PubMed Central journal article supplement (PMC7998408; doi:10.3390/jcm10061172), 2021-03-11

## Supplementary materials

**Reagents.** The fluorescent probes Bis-(Dibutylbarbituric Acid) Trimethine Oxonol (DIBAC), FLUO-4, 5-chloromethyl fluorescein diacetate (CMFDA), 4-Amino-5-Methylamino-2'7'-Difluorescein Diacetate (DAF-FM DA), 2'7'-dichlorodihydrofluorescein (DCFH), MitoSOX™ Red (MitoSOX), Mitotracker Green, BODIPY 665/676 C 11 (B665), Tetramethylrhodamine (TMRM) and dihydrorhodamine 1,2,3 (DHR1,2,3), were from Molecular Probes (Eugene, OR). Dihydroethidium (HE), Propidium Iodide (PI), fluorescein 5-thiosemicarbazide (FTC), 4', 6'-Diamidino-2-phenylindole dihydrochloride (DAPI), and Mitochondria peroxy yellow 1 (MitoPY 1) were from Sigma (San Luis, MO). Anexine V was purchased from Immunostep (Salamanca, Spain). The inducers tert-Butyl hydroperoxide (t-BHP), Ionomycin ionophore, Diethyl maleate (DEM), Plumbagin (PB), Carbonyl cyanide 4-(trifluoromethoxy)phenylhydrazone (FCCP), and Menadione were from Sigma (San Luis, MO). NOR-1 was from Santa Cruz Biotechnology (Dallas, TX).

## Step-by-step protocol

### LABORATORY PROTOCOL TO MEASURE THE OXIDATIVE STRESS PROFILE OF HUMAN NASAL EPITHELIAL CELLS BY FLOW CYTOMETRY

To obtain a nasal epithelial biopsy, insert a cytology brush into the patient's nostril and gently brushed the nasal epithelium of the middle meatus for about 20 seconds.

Put the cytology brush containing the nasal epithelial biopsy in a 15 ml sterile tissue culture tube containing Medium199 supplemented with Hanks' salts, L-glutamine, 25 mM HEPES 1% penicillin/streptomycin. Take it to the lab.

Gently shake the brush to lose cells into the medium. Filter using 50 µm CellTrics® filters (25004-0042-2317 Sysmex) to isolate individual cells from cell debris and aggregates.

Count cells using a FACS Verse Cytometer. At this step, you know the number of cells per µl in your sample.

Unless otherwise stated perform all incubations in the dark.

### PLASMA MEMBRANE POTENTIAL

#### *BASAL*

1. Take enough sample volume to have 8000 cells.
2. Add 3 µl of DIBAC (stock 100µM) to a final concentration of 1.2µM.
3. Add 2µl of PI (stock 1mg/ml) to a final concentration of 8µg/ml.
4. Add Medium199 to a total volume of 250µl.
5. Incubate 20min at 37°C.
6. Measure fluorescence using a FACS Verse Cytometer (Excitation laser 488 nm; Detector: 527/32507 LP).

#### *POSITIVE CONTROL*

1. Take enough sample volume to have 8000 cells.
2. Add 3.25µl of t-BHP (stock 7.7mM) to a final concentration of 100µM.
3. Incubate 15min at 37°C.
4. Add 3 µl of DIBAC (stock 100µM) to a final concentration of 1.2µM.
5. Add 2µl of PI (stock 1mg/ml) to a final concentration of 8µg/ml.
6. Incubate 30min at 37°C.
7. Measure fluorescence using a FACS Verse Cytometer (Excitation laser 488 nm; Detector: 527/32507 LP).

### INTRACELLULAR Ca<sup>2+</sup>

#### *BASAL*

1. Take enough sample volume to have 8000 cells.
2. Add 2.5µl of FLUO-4 (stock 50µM) to a final concentration of 0.5µM.
3. Add 0.2µl of DAPI (stock 1mg/ml) to a final concentration of 800ng/ml.
4. Add Medium199 to a total volume of 250µl.
5. Incubate 20min at 37°C.

6. Measure fluorescence using a LSR Fortessa X-20 Cytometer (Excitation laser 488 nm; Detector: 530/30505 LP).

#### *POSITIVE CONTROL-KINETICS*

1. Take enough sample volume to have 12000 cells.
2. Add 2.5µl of FLUO-4 (stock 50µM) to a final concentration of 0.5µM.
3. Add 0.2µl of DAPI (stock 1mg/ml) to a final concentration of 800ng/ml.
4. Add Medium199 to a total volume of 250µl.
5. Incubate 20min at 37°C.
6. Start fluorescence measurement using a LSR Fortessa X-20 Cytometer (Excitation laser 488 nm; Detector: 530/30505 LP).
7. Pause acquisition process
8. Add 9.34µl of Ionomycin (stock 1.338mM) to a final concentration of 50µM
9. Continue the acquisition process until 600s.

#### **REDUCED THIOLS (GSH)**

##### *BASAL*

1. Take enough sample volume to have 8000 cells.
2. Add 0.625µl of CMF-DA (stock 10µM) to a final concentration of 25nM.
3. Add 0.2µl of DAPI (stock 1mg/ml) to a final concentration of 800ng/ml.
4. Add Medium199 to a total volume of 250µl.
5. Incubate 20min at 37°C.
6. Measure fluorescence using a FACS Verse Cytometer (Excitation laser 488 nm; Detector: 527/32507 LP).

##### *POSITIVE CONTROL*

1. Take enough sample volume to have 8000 cells.
2. Add 20 mM DEM
3. Incubate 90min at 37°C
4. Add 0.625µl of CMF-DA (stock 10µM) to a final concentration of 25nM.
5. Add 0.2µl of DAPI (stock 1mg/ml) to a final concentration of 800ng/ml.
6. Incubate 30min at 37°C.
7. Measure fluorescence using a FACS Verse Cytometer (Excitation laser 488 nm; Detector: 527/32507 LP).

#### **Nitric Oxide**

##### *BASAL*

1. Take enough sample volume to have 8000 cells.
2. Add 0.2µl of DAF-FMDA (stock 1.25mM) to a final concentration of 1µM.
3. Add 0.2µl of DAPI (stock 1mg/ml) to a final concentration of 800ng/ml.
4. Add Medium199 to a total volume of 250µl.

5. Incubate 20min at 37°C.
6. Measure fluorescence using a LSR Fortessa X-20 Cytometer (Excitation laser 488 nm; Detector: 530/30505 LP).

#### *POSITIVE CONTROL-KINETICS*

1. Take enough sample volume to have 12000 cells.
2. Add 0.2µl of DAF-FMDA (stock 1.25mM) to a final concentration of 1µM.
3. Add 0.2µl of DAPI (stock 1mg/ml) to a final concentration of 800ng/ml.
4. Add Medium199 to a total volume of 250µl.
5. Incubate 20min at 37°C.
6. Start fluorescence measurement using a LSR Fortessa X-20 Cytometer (Excitation laser 488 nm; Detector: 530/30505 LP).
7. Pause acquisition process
8. Add 4µl of NOR-1 (stock 1mg/ml) to a final concentration of 16µg/ml
9. Continue the acquisition process until 300s.

#### **INTRACELLULAR PEROXIDES**

##### *BASAL*

1. Take enough sample volume to have 8000 cells.
2. Add 0.625µl of DCF (stock 1mg/ml) to a final concentration of 2.5µg/ml.
3. Add 0.2µl of DAPI (stock 1mg/ml) to a final concentration of 800ng/ml.
4. Add Medium199 to a total volume of 250µl.
5. Incubate 20min at 37°C.
6. Measure fluorescence using a FACS Verse Cytometer (Excitation laser 488 nm; Detector: 527/32507 LP).

##### *POSITIVE CONTROL*

1. Take enough sample volume to have 8000 cells.
2. Add 3.25µl of t-BHP (stock 7.7mM) to a final concentration of 100µM
3. Incubate 15min at 37°C
4. Add 0.625µl of DCF (stock 1mg/ml) to a final concentration of 2.5µg/ml.
5. Add 0.2µl of DAPI (stock 1mg/ml) to a final concentration of 800ng/ml.
6. Incubate for 30min at 37°C.
7. Measure fluorescence using a FACS Verse Cytometer (Excitation laser 488 nm; Detector: 527/32507 LP).

#### **MITOCHONDRIAL O<sub>2</sub><sup>-</sup>**

##### *BASAL*

1. Take enough sample volume to have 8000 cells.
2. Add 0.32µL of MitoSOX (stock 0.5mM) to a final concentration of 640nM.
3. Add 0.2µl of DAPI (stock 1mg/ml) to a final concentration of 800ng/ml.

4. Add Medium199 to a total volume of 250 $\mu$ l.
5. Incubate 20min at 37°C.
6. Measure fluorescence using a FACS Verse Cytometer (Excitation laser 488 nm; Detector: 700/54665 LP).

#### *POSITIVE CONTROL*

1. Take enough sample volume to have 8000 cells.
2. Add 0.2 $\mu$ l of PB (stock 2.8mg/ml) to a final concentration of 2.24 $\mu$ g/ml
3. Incubate 15min at 37°C
4. Add 0.32 $\mu$ L of MitoSOX (stock 0.5mM) to a final concentration of 640nM.
5. Add 0.2 $\mu$ l of DAPI (stock 1mg/ml) to a final concentration of 800ng/ml.
6. Incubate 30min at 37°C.
7. Measure fluorescence using a FACS Verse Cytometer (Excitation laser 488 nm; Detector: 700/54665 LP).

#### **MITOCHONDRIAL MASS**

1. Take enough sample volume to have 8000 cells.
2. Add 1.95 $\mu$ L of Mitotracker Green (stock 10 $\mu$ M) to a final concentration of 78nM.
3. Add 0.2 $\mu$ l of DAPI (stock 1mg/ml) to a final concentration of 800ng/ml.
4. Add Medium199 to a total volume of 250 $\mu$ l.
5. Incubate 20min at 37°C.
6. Measure fluorescence using a FACS Verse Cytometer (Excitation laser 488 nm; Detector: 527/32507 LP).

#### **OXIDIZED/REDUCED LIPID RATIO**

##### *BASAL*

1. Take enough sample volume to have 12000 cells.
2. Add 0.2 $\mu$ l of BODIPY665/676 (stock 1mM) to a final concentration of 800nM.
3. Add 0.2 $\mu$ l of DAPI (stock 1mg/ml) to a final concentration of 800ng/ml.
4. Add Medium199 to a total volume of 250 $\mu$ l.
5. Incubate 30min at 37°C.
6. Measure fluorescence using a FACS Aria III Cytometer (Excitation laser 488 nm and 635 nm; Detector: 588/42556 LP and 780/60735 LP).

##### *POSITIVE CONTROL*

1. Take enough sample volume to have 12000 cells.
2. Add 3.25 $\mu$ l of t-BHP (stock 7.7mM) to a final concentration of 100 $\mu$ M
3. Incubate 15min at 37°C
4. Add 0.2 $\mu$ l of BODIPY665/676 (stock 1mM) to a final concentration of 800nM.
5. Add 0.2 $\mu$ l of DAPI (stock 1mg/ml) to a final concentration of 800ng/ml.
6. Incubate 30min at 37°C.

7. Measure fluorescence using a FACS Aria III Cytometer (Excitation laser 488 nm and 635 nm; Detector: 588/42556 LP and 780/60735 LP).

#### **MITOCHONDRIAL MEMBRANE POTENTIAL**

##### *BASAL*

1. Take enough sample volume to have 8000 cells.
2. Add 0.625µl of TMRM (stock 240µM) to a final concentration of 600nM.
3. Add 0.2µl of DAPI (stock 1mg/ml) to a final concentration of 800ng/ml.
4. Add Medium199 to a total volume of 250µl.
5. Incubate 20min at 37°C.
6. Measure fluorescence using a FACS Verse Cytometer (Excitation laser 488 nm; Detector: 586/42560 LP).
- 7.

##### *POSITIVE CONTROL*

1. Take enough sample volume to have 8000 cells.
2. Add 1.3µl of FCCP (stock 10mM) to a final concentration of 52µM
3. Incubate 15min at 37°C
4. Add 0.625µl of TMRM (stock 240µM) to a final concentration of 600nM.
5. Add 0.2µl of DAPI (stock 1mg/ml) to a final concentration of 800ng/ml.
6. Incubate 30min at 37°C.
7. Measure fluorescence using a FACS Verse Cytometer (Excitation laser 488 nm; Detector: 586/42560 LP).

#### **Peroxonitrites (ONOO<sup>-</sup>)**

##### *BASAL*

1. Take enough sample volume to have 12000 cells.
2. Add 5µl of DHR1,2,3 (stock 5mM) to a final concentration of 100µM.
3. Add 0.2µl of DAPI (stock 1mg/ml) to a final concentration of 800ng/ml.
4. Add Medium199 to a total volume of 250µl.
5. Incubate 20min at 37°C.
6. Measure fluorescence using a LSR Fortessa X-20 Cytometer (Excitation laser 488 nm; Detector: 530/30505 LP).

##### *POSITIVE CONTROL-KINETICS*

1. Take enough sample volume to have 12000 cells.
2. Add 5µl of DHR1,2,3 (stock 5mM) to a final concentration of 100µM.
3. Add 0.2µl of DAPI (stock 1mg/ml) to a final concentration of 800ng/ml.
4. Add Medium199 to a total volume of 250µl.
5. Incubate 20min at 37°C.
7. Start fluorescence measurement using a LSR Fortessa X-20 Cytometer (Excitation laser 488 nm; Detector: 530/30505 LP).

6. Pause acquisition process
7. Add 4 $\mu$ l of NOR-1 (stock 1mg/ml) to a final concentration of 16 $\mu$ g/ml
8. Continue the acquisition process
9. Pause acquisition process
10. Add 0.2 $\mu$ l of PB (stock 2.8mg/ml) to a final concentration of 2.24 $\mu$ g/ml
11. Continue the acquisition process until 200s.

### **Superoxide anion (O<sub>2</sub><sup>-</sup>)**

#### *BASAL*

1. Take enough sample volume to have 8000 cells.
2. Add 0.625 $\mu$ L of HE (stock 1mg/ml) to a final concentration of 2.5 $\mu$ g/ml.
3. Add 0.2 $\mu$ l of DAPI (stock 1mg/ml) to a final concentration of 800ng/ml.
4. Add Medium199 to a total volume of 250 $\mu$ l.
5. Incubate 20min at 37°C.
6. Measure fluorescence using a FACS Verse Cytometer (Excitation laser 488 nm; Detector: 700/54665 LP).

#### *POSITIVE CONTROL*

1. Take enough sample volume to have 8000 cells.
2. Add 0.2 $\mu$ l of PB (stock 2.8mg/ml) to a final concentration of 2.24 $\mu$ g/ml
3. Incubate 15min at 37°C
4. Add 0.625 $\mu$ L of HE (stock 1mg/ml) to a final concentration of 2.5 $\mu$ g/ml.
5. Add 0.2 $\mu$ l of DAPI (stock 1mg/ml) to a final concentration of 800ng/ml.
6. Incubate 30min at 37°C.
7. Measure fluorescence using a FACS Verse Cytometer (Excitation laser 488 nm; Detector: 700/54665 LP).

### **PROTEIN CARBONYLATION**

#### *BASAL*

1. Take enough sample volume to have 8000 cells.
2. Add 0.2 $\mu$ L of FTC (stock 1mM) to a final concentration of 800nM.
3. Add 0.2 $\mu$ l of DAPI (stock 1mg/ml) to a final concentration of 800ng/ml.
4. Add Medium199 to a total volume of 250 $\mu$ l.
5. Incubate 20min at 37°C.
6. Measure fluorescence using a FACS Verse Cytometer (Excitation laser 488 nm; Detector: 527/32507 LP).

#### *POSITIVE CONTROL*

1. Take enough sample volume to have 8000 cells.
2. Add Menadione (stock 10mg/ml) to a final concentration of 1mM
3. Incubate 60min at 37°C

4. Add 0.2µL of FTC (stock 1mM) to a final concentration of 800nM.
5. Add 0.2µl of DAPI (stock 1mg/ml) to a final concentration of 800ng/ml.
6. Incubate 30min at 37°C.
7. Measure fluorescence using a FACS Verse Cytometer (Excitation laser 488 nm; Detector: 527/32507 LP).

### **MITOCHONDRIAL H<sub>2</sub>O<sub>2</sub>**

#### *BASAL*

1. Take enough sample volume to have 8000 cells.
2. Add 1µL of MitoPY (stock 1mM) to a final concentration of 4µM.
3. Add 0.2µl of DAPI (stock 1mg/ml) to a final concentration of 800ng/ml.
4. Add Medium199 to a total volume of 250µl.
5. Incubate 20min at 37°C.
6. Measure fluorescence using a FACS Verse Cytometer (Excitation laser 488 nm; Detector: 527/32507 LP).

#### *POSITIVE CONTROL*

1. Take enough sample volume to have 12000 cells.
2. Add 3.25µl of t-BHP (stock 7.7mM) to a final concentration of 100µM
3. Incubate 15min at 37°C
4. Add 1µL of MitoPY (stock 1mM) to a final concentration of 4µM.
5. Add 0.2µl of DAPI (stock 1mg/ml) to a final concentration of 800ng/ml.
6. Incubate 30min at 37°C.
7. Measure fluorescence using a FACS Verse Cytometer (Excitation laser 488 nm; Detector: 527/32507 LP).

### **APOPTOSIS**

1. Take enough sample volume to have 12000 cells.
2. Add 5 µl of Annexin V and 5 µl of PI
3. Add Annexin V-binding buffer (previously diluted /10 in PBS) to a total volume of 100 µl.
4. Incubate 15min at RT.
5. After incubation, add 300 µl of 1/10 dilution of Annexin V-binding buffer before reading fluorescence.
6. Measure fluorescence using a FACS Verse Cytometer (Excitation laser 488 nm; Detector: 527/32507 LP).



**Table S1.** Basal labeling and the corresponding positive control for intracellular H<sub>2</sub>O<sub>2</sub> from six healthy individuals. Arbitrary fluorescence units (FU) for each labeling are shown. Fluorescence means and standard deviation (SD) of basal and induced values are shown. Significant statistical differences are observed between basal and induced measurements (Paired t-test; p<0.0001).

| Sample | Basal H <sub>2</sub> O <sub>2</sub> (FU) | t-BHP-induced H <sub>2</sub> O <sub>2</sub> (FU) |
|--------|------------------------------------------|--------------------------------------------------|
| 1      | 573                                      | 1010                                             |
| 2      | 524                                      | 943                                              |
| 3      | 386                                      | 816                                              |
| 4      | 449                                      | 853                                              |
| 5      | 543                                      | 1012                                             |
| 6      | 599                                      | 1165                                             |
| Mean   | 512                                      | 966                                              |
| SD     | 80                                       | 126                                              |

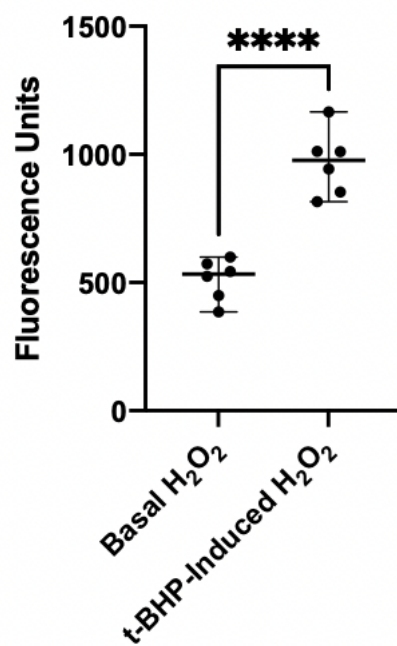

**Table S2.** Basal labeling and the corresponding positive control for  $O_2^-$  from six healthy individuals. Arbitrary fluorescence units (FU) for each labeling are shown. Fluorescence means and standard deviation (SD) of basal and induced values are shown. Significant statistical differences are observed between basal and induced measurements (Paired t-test;  $p < 0.001$ ).

| Sample | Basal $O_2^-$ (FU) | Plumbagin-induced $O_2^-$ (FU) |
|--------|--------------------|--------------------------------|
| 1      | 694                | 1101                           |
| 2      | 698                | 943                            |
| 3      | 849                | 816                            |
| 4      | 724                | 853                            |
| 5      | 370                | 1012                           |
| 6      | 607                | 1165                           |
| Mean   | 657                | 1130                           |
| SD     | 160                | 157                            |

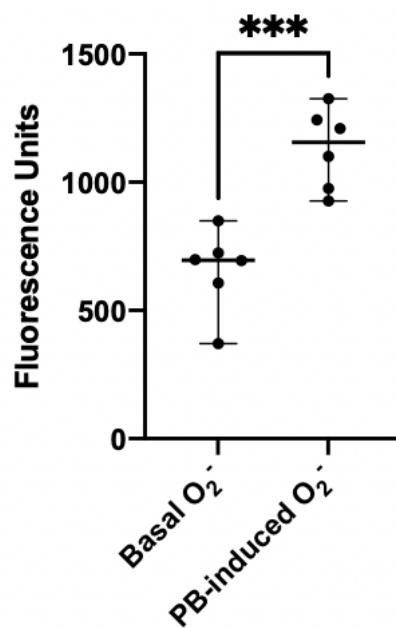

**Table S3.** Basal labeling and the corresponding positive control for nitric oxide (NO) from six healthy individuals. Arbitrary fluorescence units (FU) for each labeling are shown. Fluorescence means and standard deviation (SD) of basal and induced values are shown. Significant statistical differences are observed between basal and induced measurements (Paired t-test;  $p < 0.01$ ).

| Sample | Basal NO (FU) | NOR1-induced NO (FU) |
|--------|---------------|----------------------|
| 1      | 42            | 245                  |
| 2      | 75            | 159                  |
| 3      | 144           | 378                  |
| 4      | 141           | 256                  |
| 5      | 59            | 127                  |
| 6      | 66            | 135                  |
| Mean   | 114           | 217                  |
| SD     | 70            | 96                   |

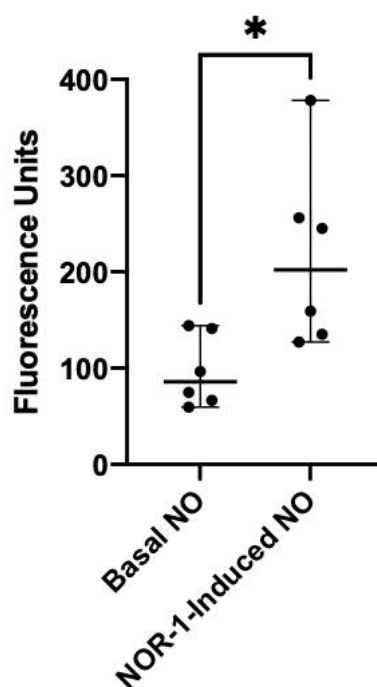

**Table S4.** Basal labeling and the corresponding positive control for peroxynitrite (ONOO<sup>-</sup>) from six healthy individuals. Arbitrary fluorescence units (FU) for each labeling are shown. Fluorescence means and standard deviation (SD) of basal and induced values are shown. Significant statistical differences are observed between basal and induced measurements (Paired t-test; p<0.001).

| Sample | Basal ONOO <sup>-</sup> (FU) | NOR1-induced ONOO <sup>-</sup> (FU) |
|--------|------------------------------|-------------------------------------|
| 1      | 41                           | 146                                 |
| 2      | 39                           | 184                                 |
| 3      | 45                           | 1445                                |
| 4      | 10                           | 45                                  |
| 5      | 32                           | 168                                 |
| 6      | 53                           | 176                                 |
| Mean   | 37                           | 144                                 |
| SD     | 15                           | 51                                  |

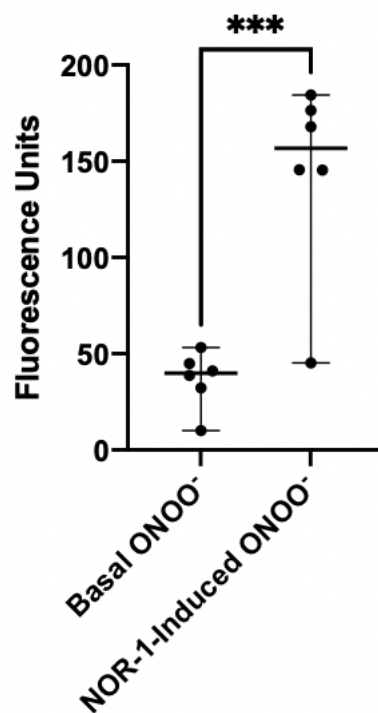

**Table S5.** Basal labeling and the corresponding positive control for GSH from six healthy individuals. Arbitrary fluorescence units (FU) for each labeling are shown. Fluorescence means and standard deviation (SD) of basal and induced values are shown. Significant statistical differences are observed between basal and induced measurements (Paired t-test;  $p < 0.0001$ ).

| Sample | Basal GSH (FU) | DEM-depleted GSH |
|--------|----------------|------------------|
| 1      | 1216           | 261              |
| 2      | 1418           | 287              |
| 3      | 1818           | 314              |
| 4      | 1811           | 275              |
| 5      | 1369           | 325              |
| 6      | 1891           | 246              |
| Mean   | 1587           | 285              |
| SD     | 286            | 30               |

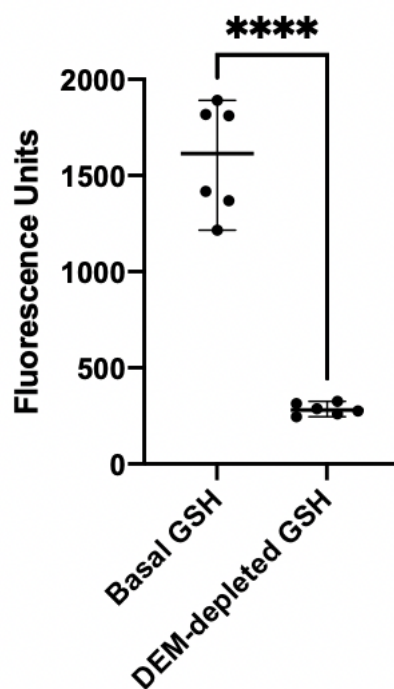

**Table S6.** Basal labeling and the corresponding positive control for intracellular Calcium ( $iCa_2^+$ ) from six healthy individuals. Arbitrary fluorescence units (FU) for each labeling are shown. Fluorescence means and standard deviation (SD) of basal and induced values are shown. Significant statistical differences are observed between basal and induced measurements (Paired t-test;  $p < 0.01$ ).

| Sample | Basal $iCa_2^+$ (FU) | NOR1-induced $iCa_2^+$ (FU) |
|--------|----------------------|-----------------------------|
| 1      | 42                   | 94                          |
| 2      | 23                   | 64                          |
| 3      | 32                   | 73                          |
| 4      | 23                   | 57                          |
| 5      | 47                   | 92                          |
| 6      | 93                   | 162                         |
| Mean   | 43                   | 90                          |
| SD     | 26                   | 38                          |

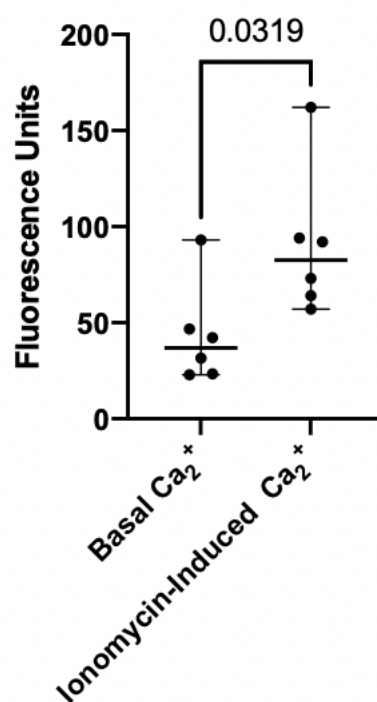

**Table S7.** Basal labeling and the corresponding positive control for plasmatic membrane potential (PMP) from six healthy individuals. Arbitrary fluorescence units (FU) for each labeling are shown. Fluorescence means and standard deviation (SD) of basal and induced values are shown. Significant statistical differences are observed between basal and induced measurements (Paired t-test;  $p < 0.0001$ ).

| Sample | Basal PMP (FU) | t-BHP-induced PMP (FU) |
|--------|----------------|------------------------|
| 1      | 740            | 115                    |
| 2      | 749            | 143                    |
| 3      | 1012           | 247                    |
| 4      | 790            | 190                    |
| 5      | 1058           | 249                    |
| 6      | 988            | 220                    |
| Mean   | 889            | 194                    |
| SD     | 145            | 55                     |

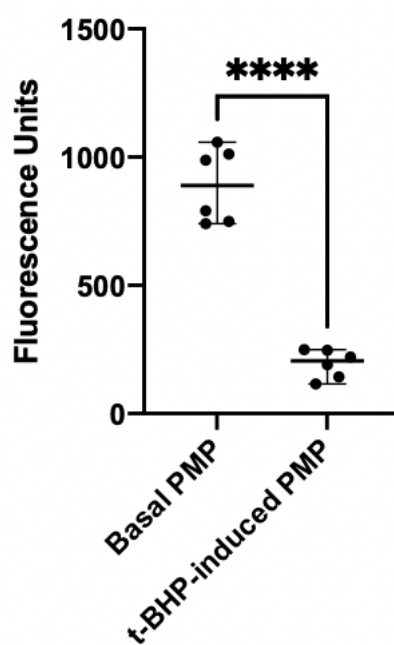

**Table S8.** Basal labeling and the corresponding positive control for mitochondrial membrane potential ( $\Delta\psi_m$ ) from six healthy individuals. Arbitrary fluorescence units (FU) for each labeling are shown. Fluorescence means and standard deviation (SD) of basal and induced values are shown. Significant statistical differences are observed between basal and induced measurements (Paired t-test;  $p < 0.001$ ).

| Sample | Basal ( $\Delta\psi_m$ ) (FU) | TMRM-induced ( $\Delta\psi_m$ ) (FU) |
|--------|-------------------------------|--------------------------------------|
| 1      | 1763                          | 2540                                 |
| 2      | 948                           | 1810                                 |
| 3      | 1249                          | 2427                                 |
| 4      | 1290                          | 2430                                 |
| 5      | 1519                          | 2501                                 |
| 6      | 1417                          | 2498                                 |
| Mean   | 1364                          | 2368                                 |
| SD     | 275                           | 277                                  |

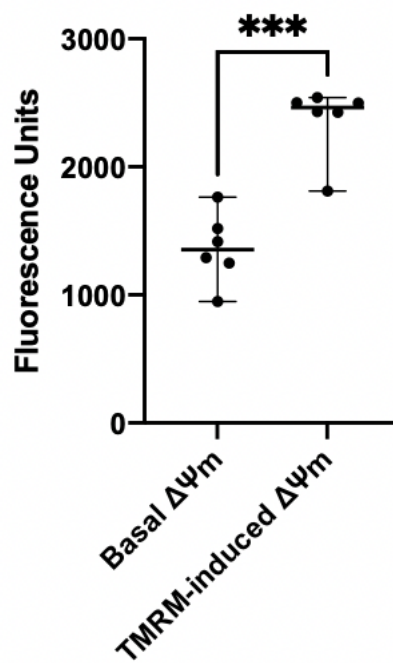



**Table S9.** Basal labeling and the corresponding positive control for mitochondrial H<sub>2</sub>O<sub>2</sub> (mt H<sub>2</sub>O<sub>2</sub>) from six healthy individuals. Arbitrary fluorescence units (FU) for each labeling are shown. Fluorescence means and standard deviation (SD) of basal and induced values are shown. Significant statistical differences are observed between basal and induced measurements (Paired t-test; p<0.001).

| Sample | Basal mtH <sub>2</sub> O <sub>2</sub> (FU) | t-BHP-induced mtH <sub>2</sub> O <sub>2</sub> (FU) |
|--------|--------------------------------------------|----------------------------------------------------|
| 1      | 473                                        | 652                                                |
| 2      | 494                                        | 657                                                |
| 3      | 515                                        | 690                                                |
| 4      | 502                                        | 659                                                |
| 5      | 479                                        | 649                                                |
| 6      | 476                                        | 628                                                |
| Mean   | 490                                        | 655                                                |
| SD     | 17                                         | 20                                                 |

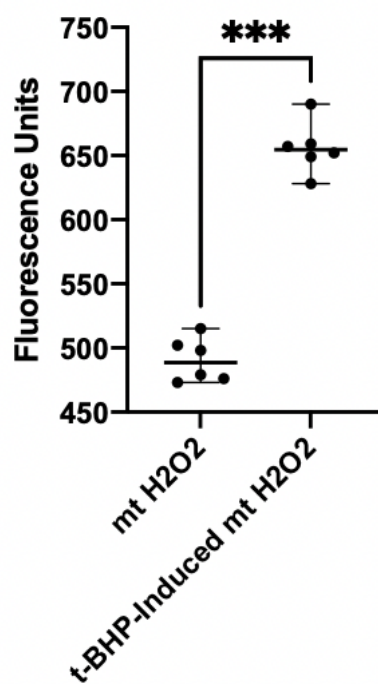

**Table S10.** Basal labeling and the corresponding positive control for mitochondrial  $O_2^-$  ( $mtO_2^-$ ) from six healthy individuals. Arbitrary fluorescence units (FU) for each labeling are shown. Fluorescence means and standard deviation (SD) of basal and induced values are shown. Significant statistical differences are observed between basal and induced measurements (Paired t-test;  $p < 0.001$ ).

| Sample | Basal $mtO_2^-$ (FU) | Plumbagin-induced $mtO_2^-$ (FU) |
|--------|----------------------|----------------------------------|
| 1      | 750                  | 1108                             |
| 2      | 969                  | 2746                             |
| 3      | 686                  | 1847                             |
| 4      | 853                  | 1468                             |
| 5      | 1345                 | 3725                             |
| 6      | 1190                 | 3101                             |
| Mean   | 965                  | 2499                             |
| SD     | 257                  | 926                              |

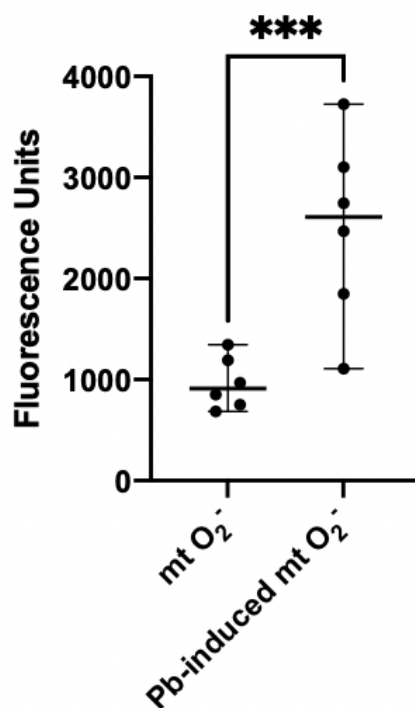

**Table S11.** Labeling for mitochondrial mass from six healthy individuals. Arbitrary fluorescence units (FU) for each sample are shown. Fluorescence means and standard deviation (SD) of basal values are shown.

| Sample | Mitochondrial mass (FU) |
|--------|-------------------------|
| 1      | 2543                    |
| 2      | 2176                    |
| 3      | 2247                    |
| 4      | 2326                    |
| 5      | 2574                    |
| 6      | 2722                    |
| Mean   | 2431                    |
| SD     | 213                     |

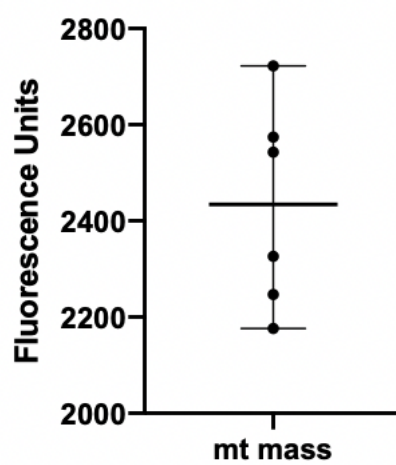

**Table S12.** Basal labeling and the corresponding positive control for carbonylated proteins from six healthy individuals. Arbitrary fluorescence units (FU) for each labeling are shown. Fluorescence means and standard deviation (SD) of basal and induced values are shown. Significant statistical differences are observed between basal and induced measurements (Paired t-test;  $p < 0.001$ ).

| Sample | Basal carbonylated proteins (FU) | Menadione-induced carbonylated proteins (FU) |
|--------|----------------------------------|----------------------------------------------|
| 1      | 780                              | 1504                                         |
| 2      | 844                              | 1746                                         |
| 3      | 772                              | 1546                                         |
| 4      | 963                              | 1712                                         |
| 5      | 823                              | 1675                                         |
| 6      | 741                              | 1467                                         |
| Mean   | 820                              | 1608                                         |
| SD     | 79                               | 117                                          |

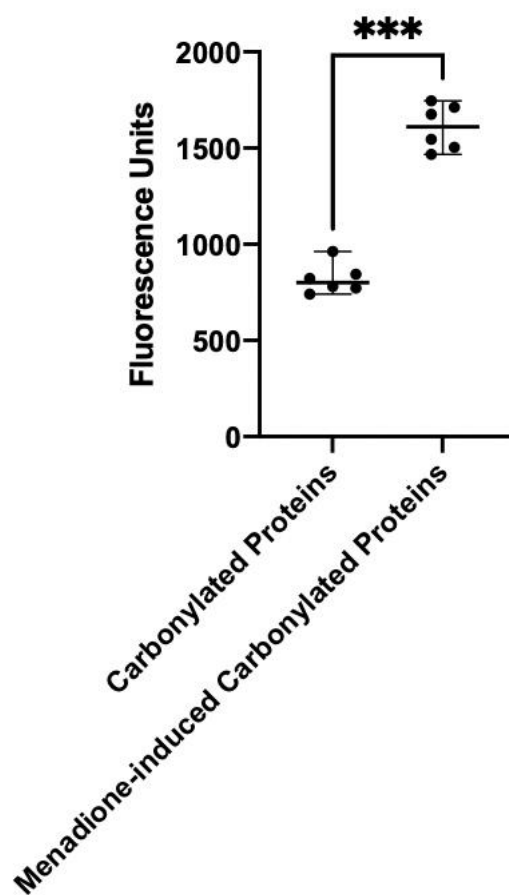

**Table S13.** Basal labeling and the corresponding positive control for the oxidized/reduced lipid ratio (ox/red lipid) from six healthy individuals. Arbitrary fluorescence units (FU) for each labeling are shown. Fluorescence means and standard deviation (SD) of basal and induced values are shown. Significant statistical differences are observed between basal and induced measurements (Paired t-test;  $p < 0.001$ ).

| Sample | Basal ox/red lipid (FU) | t-BHP-induced ox/red lipid (FU) |
|--------|-------------------------|---------------------------------|
| 1      | 147                     | 398                             |
| 2      | 306                     | 1004                            |
| 3      | 287                     | 836                             |
| 4      | 297                     | 967                             |
| 5      | 145                     | 578                             |
| 6      | 232                     | 735                             |
| Mean   | 235                     | 753                             |
| SD     | 74                      | 233                             |

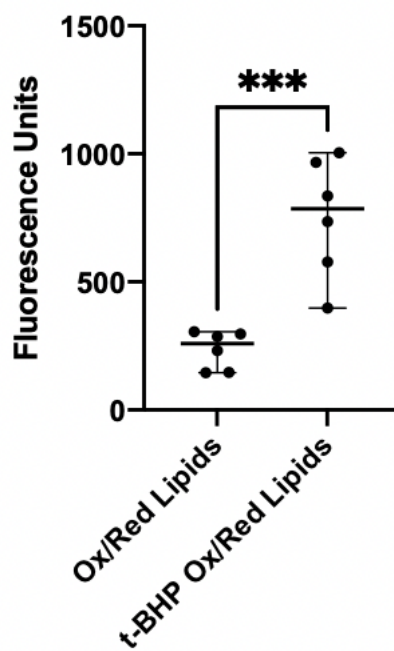

Supplement: jcm-10-01172-s001.pdf [file jcm-10-01172-s001.pdf]
